# Supplementary material
Source: publisher site journal article supplement (https://www.dovepress.com/article/461489)
Supplement: Supplementary file 1 [file get_supplementary_file.php]

**Supplementary Figure and Table**

**Supplementary Figure 1:** Gene expression in the Cuproptosis risk score between high-risk and low-risk groups.


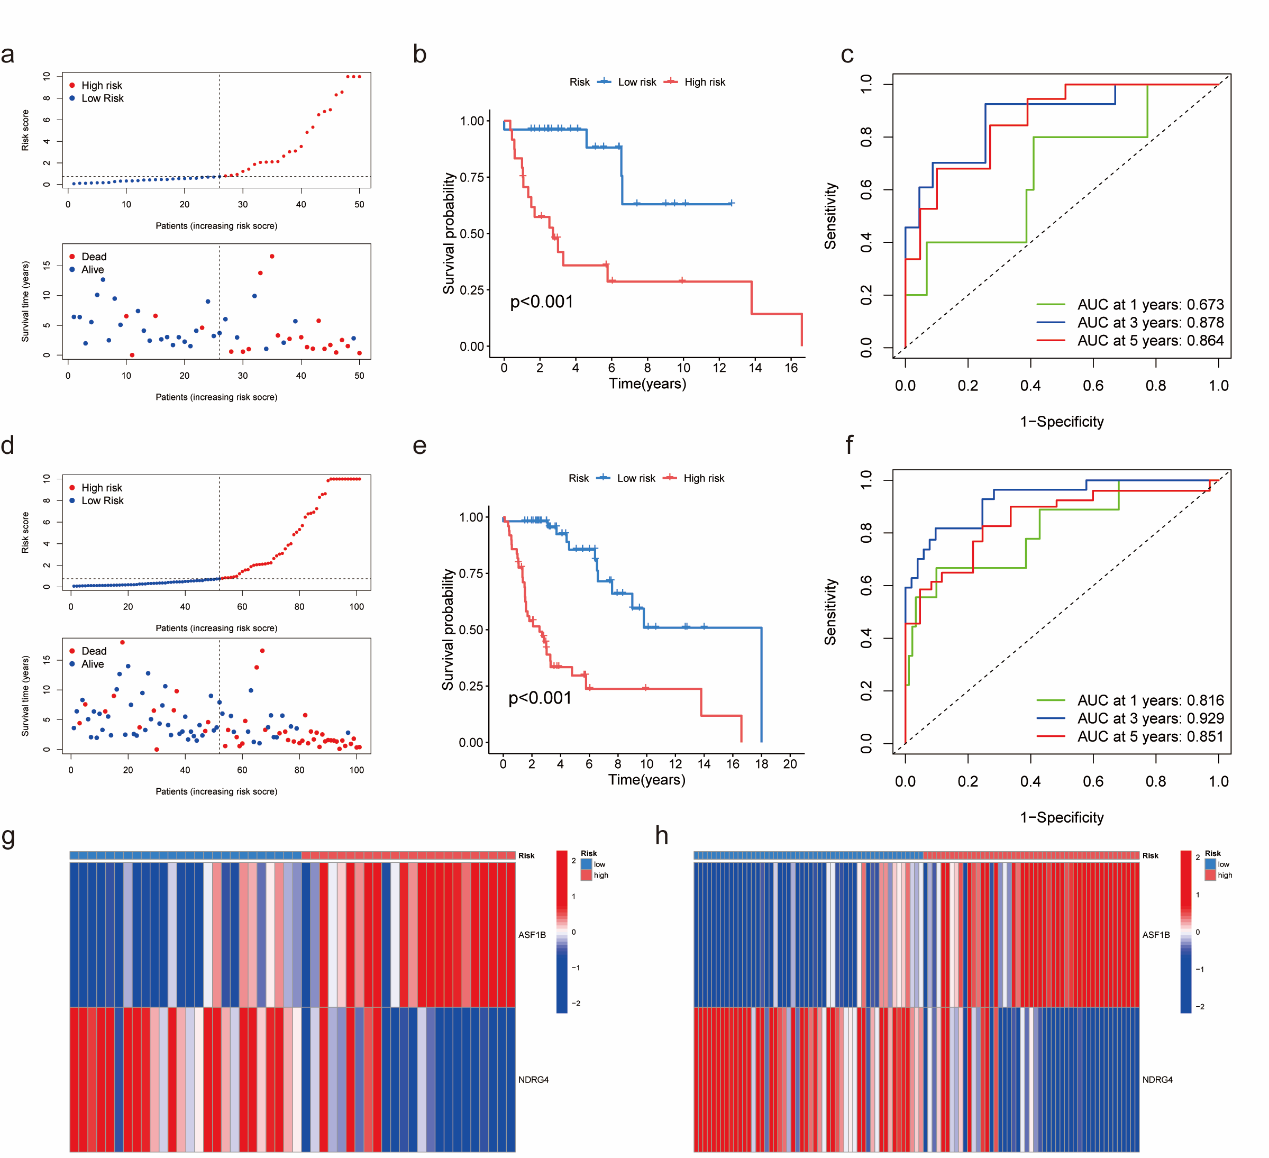


Distribution of Cuproptosis risk score and survival status of ACC patients. (a, g in the validation set; d, h in the whole patient set). Overall survival curves and ROC curves of risk groups in the validation set (b, c) and whole patient set (e, f).

**Supplementary Table 1:** Sequences of Primers used for RT-qPCR.

| **GENE** | Sequences of Primers |
| --- | --- |
| **ASF1B** |  |
| F | 5’-TCATCACCTGCACCTACCAT-3’ |
| R | 5’-AGCCTGTCCATGTTGTTGTC-3’ |
| **NDRG4** |  |
| F | 5’-GCTTCAACACCTTCTTCAACTTC-3’ |
| R | 5’-TCCGATGCCAATCACATACTT-3’ |
| **β-actin** |  |
| F | 5’-GAGAAAATCTGGCACCACACC-3’ |
| R | 5’-GGATAGCACAGCCTGGATAGCAA-3’ |

**Supplementary Table 2:** shRNA sequences.

| **shRNA** | Sequences |
| --- | --- |
| **shASF1B#1** | 5’-ATCATTTATGTTGGCTCGGCT-3’ |
| **shASF1B#2** | 5’-GAGACACATGTTTGTCTTTCA-3’ |
| **shASF1B#3** | 5’-GGGCTACTACGTCAACAACGA-3’ |
| **shASF1B#4** | 5’-CCGCTTCCATATCAACTGGGA-3’ |
| **shNDRG4#1** | 5’-CTGGAAGGAACATGACATCGA-3’ |
| **shNDRG4#2** | 5’-ACCACAAACTATGCTTCAACA-3’ |
| **shNDRG4#3** | 5’-CACTACGACCTTCCTGAAGAT-3’ |
| **shNDRG4#4** | 5’-AAGCTGACTGAAGCCTTCAAA -3’ |
| **shNC** | 5’-TTCTCCGAACGTGTCACGT-3’ |

**Supplementary Table 3:** Cuproptosis subtype results.

| ID | subtype | ID | subtype | ID | subtype |
| --- | --- | --- | --- | --- | --- |
| TCGA_TCGA-OR-A5KZ | A | TCGA_TCGA-OR-A5JA | B | TCGA_TCGA-OR-A5JX | C |
| TCGA_TCGA-OR-A5K0 | A | TCGA_TCGA-OR-A5JG | B | TCGA_TCGA-PK-A5HA | C |
| TCGA_TCGA-OR-A5L4 | A | TCGA_TCGA-OR-A5JE | B | TCGA_TCGA-OR-A5L6 | C |
| TCGA_TCGA-OR-A5J6 | A | TCGA_TCGA-OR-A5LE | B | TCGA_TCGA-OR-A5LA | C |
| TCGA_TCGA-OR-A5LJ | A | TCGA_TCGA-OR-A5K9 | B | TCGA_TCGA-PA-A5YG | C |
| TCGA_TCGA-OR-A5KU | A | TCGA_TCGA-P6-A5OG | B | TCGA_TCGA-OR-A5K1 | C |
| TCGA_TCGA-OR-A5LC | A | TCGA_TCGA-OR-A5KT | B | TCGA_TCGA-OR-A5JI | C |
| TCGA_TCGA-OR-A5J3 | A | TCGA_TCGA-OR-A5JJ | B | TCGA_TCGA-OR-A5L3 | C |
| TCGA_TCGA-P6-A5OF | A | TCGA_TCGA-OR-A5JB | B | TCGA_TCGA-OR-A5K8 | C |
| TCGA_TCGA-OU-A5PI | A | TCGA_TCGA-OR-A5KV | B | TCGA_TCGA-OR-A5LN | C |
| TCGA_TCGA-OR-A5JL | A | TCGA_TCGA-OR-A5JP | B | TCGA_TCGA-OR-A5LT | C |
| TCGA_TCGA-OR-A5JF | A | TCGA_TCGA-OR-A5KX | B | TCGA_TCGA-OR-A5LM | C |
| TCGA_TCGA-OR-A5LG | A | TCGA_TCGA-OR-A5K2 | B | TCGA_TCGA-OR-A5LK | C |
| TCGA_TCGA-OR-A5JQ | A | TCGA_TCGA-OR-A5KO | B | TCGA_TCGA-OR-A5L5 | C |
| TCGA_TCGA-OR-A5LH | A | TCGA_TCGA-OR-A5JS | B | TCGA_TCGA-PK-A5H8 | C |
| TCGA_TCGA-OR-A5L8 | A | TCGA_TCGA-OR-A5JM | B | TCGA_TCGA-OR-A5JT | C |
| TCGA_TCGA-OR-A5K6 | A | TCGA_TCGA-OR-A5J9 | B | TCGA_TCGA-OR-A5LR | C |
| TCGA_TCGA-OR-A5LB | A | TCGA_TCGA-OR-A5JZ | B | TCGA_TCGA-OR-A5JC | C |
| TCGA_TCGA-OR-A5LP | A | TCGA_TCGA-OR-A5J8 | B | TCGA_TCGA-OR-A5J5 | C |
| TCGA_TCGA-OR-A5JW | A | TCGA_TCGA-OR-A5JY | B | TCGA_TCGA-OR-A5K3 | C |
| TCGA_TCGA-OR-A5KW | A | TCGA_TCGA-OR-A5JO | B | TCGA_TCGA-OR-A5LO | C |
| TCGA_TCGA-PK-A5H9 | A | TCGA_TCGA-OR-A5K4 | B | TCGA_TCGA-OR-A5L9 | C |
| TCGA_TCGA-OR-A5JD | A | TCGA_TCGA-PK-A5HB | B | TCGA_TCGA-OR-A5LD | C |
| TCGA_TCGA-OR-A5JV | A | TCGA_TCGA-OR-A5J7 | B | TCGA_TCGA-OR-A5JK | C |
| TCGA_TCGA-OR-A5LS | A | TCGA_TCGA-OR-A5KY | B | TCGA_TCGA-OR-A5JR | C |
| TCGA_TCGA-OR-A5LL | A | TCGA_TCGA-OR-A5K5 | B | TCGA_TCGA-OR-A5J1 | C |
| GSE19750_GSM493258 | A | TCGA_TCGA-OR-A5J2 | B | GSE19750_GSM493260 | C |
| GSE19750_GSM493259 | A | GSE19750_GSM493255 | B | GSE19750_GSM493264 | C |
| GSE19750_GSM1094057 | A | GSE19750_GSM493256 | B | GSE19750_GSM493265 | C |
| GSE19750_GSM1094058 | A | GSE19750_GSM493257 | B | GSE19750_GSM493266 | C |
| GSE19750_GSM1094059 | A | GSE19750_GSM493261 | B | GSE19750_GSM493267 | C |
| GSE19750_GSM1094060 | A | GSE19750_GSM493262 | B | GSE19750_GSM493268 | C |
| GSE19750_GSM1094061 | A | GSE19750_GSM493263 | B | GSE19750_GSM493269 | C |
| GSE19750_GSM1094062 | A | GSE19750_GSM493271 | B | GSE19750_GSM493270 | C |
| GSE19750_GSM1094063 | A | GSE19750_GSM1094056 | B | GSE19750_GSM493272 | C |
| GSE19750_GSM1094064 | A | GSE19750_GSM1094065 | B | GSE19750_GSM493273 | C |
| GSE19750_GSM1094066 | A | GSE19750_GSM1094069 | B | GSE19750_GSM1094075 | C |
| GSE19750_GSM1094067 | A | GSE19750_GSM1094078 | B |  |  |
| GSE19750_GSM1094068 | A |  |  |  |  |
| GSE19750_GSM1094070 | A |  |  |  |  |
| GSE19750_GSM1094071 | A |  |  |  |  |
| GSE19750_GSM1094072 | A |  |  |  |  |
| GSE19750_GSM1094073 | A |  |  |  |  |
| GSE19750_GSM1094074 | A |  |  |  |  |
| GSE19750_GSM1094076 | A |  |  |  |  |
| GSE19750_GSM1094077 | A |  |  |  |  |
| GSE19750_GSM1094079 | A |  |  |  |  |
| GSE19750_GSM1094080 | A |  |  |  |  |

**Supplementary Table 4:** Prognostic DEGs Associated with OS.

| Id | HR | HR.95L | HR.95H | *P*value | km |
| --- | --- | --- | --- | --- | --- |
| CEP55 | 2.122 | 1.705 | 2.640 | ＜0.001 | ＜0.001 |
| MKI67 | 1.980 | 1.616 | 2.425 | ＜0.001 | ＜0.001 |
| ASPM | 2.201 | 1.739 | 2.784 | ＜0.001 | ＜0.001 |
| IQGAP3 | 2.260 | 1.771 | 2.884 | ＜0.001 | ＜0.001 |
| CDC20 | 1.780 | 1.496 | 2.119 | ＜0.001 | ＜0.001 |
| AURKB | 2.188 | 1.720 | 2.784 | ＜0.001 | ＜0.001 |
| TACC3 | 2.208 | 1.731 | 2.817 | ＜0.001 | ＜0.001 |
| KIFC1 | 2.121 | 1.682 | 2.674 | ＜0.001 | ＜0.001 |
| SPAG5 | 2.249 | 1.747 | 2.895 | ＜0.001 | ＜0.001 |
| DLGAP5 | 1.969 | 1.587 | 2.443 | ＜0.001 | ＜0.001 |
| NDC80 | 2.272 | 1.749 | 2.952 | ＜0.001 | ＜0.001 |
| CDCA5 | 2.111 | 1.663 | 2.680 | ＜0.001 | ＜0.001 |
| KIF11 | 2.173 | 1.695 | 2.787 | ＜0.001 | ＜0.001 |
| HELLS | 2.608 | 1.918 | 3.546 | ＜0.001 | ＜0.001 |
| CENPF | 1.889 | 1.538 | 2.321 | ＜0.001 | ＜0.001 |
| CKAP2L | 2.316 | 1.764 | 3.042 | ＜0.001 | ＜0.001 |
| MELK | 1.776 | 1.473 | 2.142 | ＜0.001 | ＜0.001 |
| CCNB2 | 1.995 | 1.588 | 2.506 | ＜0.001 | ＜0.001 |
| CKS2 | 2.661 | 1.926 | 3.676 | ＜0.001 | ＜0.001 |
| BIRC5 | 1.756 | 1.456 | 2.117 | ＜0.001 | ＜0.001 |
| NDRG4 | 0.650 | 0.563 | 0.750 | ＜0.001 | ＜0.001 |
| NEK2 | 2.012 | 1.586 | 2.551 | ＜0.001 | ＜0.001 |
| SPC25 | 1.990 | 1.574 | 2.515 | ＜0.001 | ＜0.001 |
| NUP188 | 2.567 | 1.862 | 3.540 | ＜0.001 | ＜0.001 |
| BUB1 | 2.100 | 1.629 | 2.708 | ＜0.001 | ＜0.001 |
| EZH2 | 2.409 | 1.783 | 3.255 | ＜0.001 | ＜0.001 |
| CDK1 | 2.087 | 1.622 | 2.685 | ＜0.001 | ＜0.001 |
| ZWINT | 2.233 | 1.695 | 2.940 | ＜0.001 | ＜0.001 |
| LMNB1 | 2.154 | 1.655 | 2.802 | ＜0.001 | ＜0.001 |
| DIAPH3 | 2.486 | 1.816 | 3.404 | ＜0.001 | ＜0.001 |
| LMNB2 | 2.963 | 2.031 | 4.324 | ＜0.001 | ＜0.001 |
| KIF23 | 2.235 | 1.689 | 2.958 | ＜0.001 | ＜0.001 |
| PHF19 | 2.502 | 1.816 | 3.449 | ＜0.001 | ＜0.001 |
| KIF4A | 1.966 | 1.546 | 2.501 | ＜0.001 | ＜0.001 |
| PITX1 | 1.591 | 1.347 | 1.880 | ＜0.001 | ＜0.001 |
| TOP2A | 1.749 | 1.427 | 2.142 | ＜0.001 | ＜0.001 |
| HAUS8 | 2.618 | 1.841 | 3.723 | ＜0.001 | ＜0.001 |
| RRM2 | 1.675 | 1.387 | 2.023 | ＜0.001 | ＜0.001 |
| CDKN3 | 1.791 | 1.447 | 2.217 | ＜0.001 | ＜0.001 |
| RAD51 | 2.165 | 1.629 | 2.878 | ＜0.001 | ＜0.001 |
| CENPU | 2.007 | 1.552 | 2.596 | ＜0.001 | ＜0.001 |
| TUBB4B | 2.015 | 1.553 | 2.614 | ＜0.001 | ＜0.001 |
| NCAPG | 1.921 | 1.507 | 2.448 | ＜0.001 | ＜0.001 |
| CCNA2 | 1.840 | 1.465 | 2.310 | ＜0.001 | ＜0.001 |
| CHEK2 | 2.050 | 1.567 | 2.681 | ＜0.001 | ＜0.001 |
| RACGAP1 | 2.044 | 1.562 | 2.674 | ＜0.001 | ＜0.001 |
| AURKA | 1.885 | 1.484 | 2.393 | ＜0.001 | ＜0.001 |
| NCAPD2 | 2.516 | 1.775 | 3.567 | ＜0.001 | ＜0.001 |
| FOXM1 | 1.939 | 1.507 | 2.495 | ＜0.001 | ＜0.001 |
| SHCBP1 | 1.924 | 1.499 | 2.471 | ＜0.001 | ＜0.001 |
| DCUN1D5 | 3.105 | 2.011 | 4.793 | ＜0.001 | ＜0.001 |
| CDC6 | 1.923 | 1.495 | 2.472 | ＜0.001 | ＜0.001 |
| FANCI | 2.185 | 1.615 | 2.955 | ＜0.001 | ＜0.001 |
| BUB1B | 1.857 | 1.462 | 2.359 | ＜0.001 | ＜0.001 |
| UBE2T | 1.861 | 1.463 | 2.367 | ＜0.001 | ＜0.001 |
| NCAPG2 | 2.245 | 1.635 | 3.084 | ＜0.001 | ＜0.001 |
| CSDC2 | 0.746 | 0.665 | 0.838 | ＜0.001 | ＜0.001 |
| ASF1B | 1.730 | 1.393 | 2.148 | ＜0.001 | ＜0.001 |
| FAM111B | 1.916 | 1.482 | 2.477 | ＜0.001 | ＜0.001 |
| FSCN1 | 1.569 | 1.313 | 1.876 | ＜0.001 | ＜0.001 |
| PSME4 | 1.901 | 1.474 | 2.451 | ＜0.001 | ＜0.001 |
| DOLPP1 | 2.244 | 1.629 | 3.092 | ＜0.001 | ＜0.001 |
| CDC25A | 2.049 | 1.540 | 2.726 | ＜0.001 | ＜0.001 |
| ZNF496 | 3.029 | 1.945 | 4.717 | ＜0.001 | ＜0.001 |
| HMGB2 | 2.199 | 1.604 | 3.014 | ＜0.001 | ＜0.001 |
| CDT1 | 1.638 | 1.344 | 1.998 | ＜0.001 | ＜0.001 |
| SWI5 | 2.061 | 1.541 | 2.757 | ＜0.001 | ＜0.001 |
| CYP27B1 | 1.813 | 1.425 | 2.306 | ＜0.001 | ＜0.001 |
| SNCG | 0.717 | 0.626 | 0.820 | ＜0.001 | ＜0.001 |
| EIF4E2 | 2.856 | 1.865 | 4.374 | ＜0.001 | ＜0.001 |
| APOBEC3B | 1.584 | 1.313 | 1.912 | ＜0.001 | ＜0.001 |
| CENPO | 2.232 | 1.608 | 3.098 | ＜0.001 | ＜0.001 |
| TYMS | 1.954 | 1.486 | 2.569 | ＜0.001 | ＜0.001 |
| FBXO5 | 2.395 | 1.674 | 3.427 | ＜0.001 | ＜0.001 |
| MED27 | 2.009 | 1.507 | 2.680 | ＜0.001 | ＜0.001 |
| GLE1 | 2.771 | 1.815 | 4.230 | ＜0.001 | ＜0.001 |
| SMYD2 | 1.890 | 1.446 | 2.469 | ＜0.001 | ＜0.001 |
| CKS1B | 1.861 | 1.433 | 2.415 | ＜0.001 | ＜0.001 |
| PLK4 | 2.286 | 1.613 | 3.241 | ＜0.001 | ＜0.001 |
| CDK5RAP2 | 2.344 | 1.636 | 3.360 | ＜0.001 | ＜0.001 |
| TMEM9 | 2.123 | 1.544 | 2.917 | ＜0.001 | ＜0.001 |
| BUB3 | 2.033 | 1.506 | 2.745 | ＜0.001 | ＜0.001 |
| FARP2 | 2.481 | 1.688 | 3.648 | ＜0.001 | ＜0.001 |
| DTYMK | 1.921 | 1.455 | 2.535 | ＜0.001 | ＜0.001 |
| FEN1 | 1.809 | 1.404 | 2.331 | ＜0.001 | ＜0.001 |
| RMI2 | 1.779 | 1.390 | 2.276 | ＜0.001 | ＜0.001 |
| TPX2 | 1.685 | 1.347 | 2.107 | ＜0.001 | ＜0.001 |
| KNSTRN | 2.187 | 1.561 | 3.064 | ＜0.001 | ＜0.001 |
| HMGN2 | 2.699 | 1.758 | 4.144 | ＜0.001 | ＜0.001 |
| FAM83D | 1.746 | 1.372 | 2.221 | ＜0.001 | ＜0.001 |
| TUBB6 | 1.613 | 1.309 | 1.989 | ＜0.001 | ＜0.001 |
| VPREB3 | 1.318 | 1.167 | 1.488 | ＜0.001 | ＜0.001 |
| MCM3 | 2.157 | 1.536 | 3.029 | ＜0.001 | ＜0.001 |
| ST3GAL4 | 1.712 | 1.350 | 2.172 | ＜0.001 | ＜0.001 |
| CCNB1 | 1.896 | 1.427 | 2.519 | ＜0.001 | ＜0.001 |
| ANLN | 1.598 | 1.297 | 1.969 | ＜0.001 | ＜0.001 |
| NETO2 | 1.470 | 1.237 | 1.746 | ＜0.001 | ＜0.001 |
| ABHD17C | 1.801 | 1.383 | 2.346 | ＜0.001 | ＜0.001 |
| TMEM184B | 2.315 | 1.587 | 3.377 | ＜0.001 | ＜0.001 |
| FAM83H | 1.804 | 1.383 | 2.353 | ＜0.001 | ＜0.001 |
| FAM189B | 1.688 | 1.333 | 2.137 | ＜0.001 | ＜0.001 |
| NXN | 1.484 | 1.241 | 1.774 | ＜0.001 | ＜0.001 |
| ECT2 | 1.677 | 1.327 | 2.119 | ＜0.001 | ＜0.001 |
| DUSP5 | 1.661 | 1.318 | 2.093 | ＜0.001 | ＜0.001 |
| SNRPA1 | 1.958 | 1.439 | 2.664 | ＜0.001 | ＜0.001 |
| CENPN | 1.938 | 1.426 | 2.632 | ＜0.001 | ＜0.001 |
| ARPC2 | 2.107 | 1.486 | 2.986 | ＜0.001 | ＜0.001 |
| ATAD2 | 1.721 | 1.333 | 2.222 | ＜0.001 | ＜0.001 |
| HMMR | 1.675 | 1.313 | 2.136 | ＜0.001 | ＜0.001 |
| ZNF367 | 1.594 | 1.277 | 1.990 | ＜0.001 | ＜0.001 |
| MTF2 | 2.252 | 1.529 | 3.318 | ＜0.001 | ＜0.001 |
| SLC2A6 | 1.445 | 1.211 | 1.724 | ＜0.001 | ＜0.001 |
| G0S2 | 0.777 | 0.688 | 0.877 | ＜0.001 | ＜0.001 |
| MOB4 | 1.505 | 1.236 | 1.832 | ＜0.001 | ＜0.001 |
| PPP2R5C | 2.155 | 1.489 | 3.119 | ＜0.001 | ＜0.001 |
| LRRC8D | 1.760 | 1.338 | 2.315 | ＜0.001 | ＜0.001 |
| ZBTB34 | 2.318 | 1.541 | 3.488 | ＜0.001 | ＜0.001 |
| DPH2 | 1.981 | 1.416 | 2.772 | ＜0.001 | ＜0.001 |
| POLE3 | 1.816 | 1.352 | 2.441 | ＜0.001 | ＜0.001 |
| MCM4 | 1.908 | 1.385 | 2.628 | ＜0.001 | ＜0.001 |
| PTPRF | 1.547 | 1.243 | 1.925 | ＜0.001 | ＜0.001 |
| ETV4 | 1.300 | 1.139 | 1.484 | ＜0.001 | ＜0.001 |
| DR1 | 2.132 | 1.454 | 3.126 | ＜0.001 | ＜0.001 |
| TMX2 | 2.021 | 1.414 | 2.889 | ＜0.001 | ＜0.001 |
| DUSP12 | 1.908 | 1.371 | 2.655 | ＜0.001 | ＜0.001 |
| SLC41A1 | 1.684 | 1.286 | 2.204 | ＜0.001 | ＜0.001 |
| SCAP | 1.681 | 1.284 | 2.201 | ＜0.001 | ＜0.001 |
| TBC1D13 | 1.932 | 1.371 | 2.723 | ＜0.001 | ＜0.001 |
| TUBB2A | 1.364 | 1.161 | 1.604 | ＜0.001 | ＜0.001 |
| NDC1 | 1.780 | 1.318 | 2.404 | ＜0.001 | ＜0.001 |
| NPM3 | 1.587 | 1.245 | 2.023 | ＜0.001 | ＜0.001 |
| ILF2 | 1.876 | 1.346 | 2.615 | ＜0.001 | ＜0.001 |
| FASN | 1.400 | 1.171 | 1.674 | ＜0.001 | ＜0.001 |
| CHST10 | 1.728 | 1.292 | 2.312 | ＜0.001 | ＜0.001 |
| EMC9 | 1.823 | 1.324 | 2.509 | ＜0.001 | 0.001 |
| NOL10 | 2.387 | 1.501 | 3.797 | ＜0.001 | ＜0.001 |
| ARL6IP6 | 1.919 | 1.352 | 2.725 | ＜0.001 | ＜0.001 |
| RANBP1 | 1.702 | 1.279 | 2.265 | ＜0.001 | ＜0.001 |
| PSMD2 | 2.387 | 1.495 | 3.813 | ＜0.001 | ＜0.001 |
| PTGFRN | 1.746 | 1.291 | 2.361 | ＜0.001 | ＜0.001 |
| IRAK1 | 1.740 | 1.289 | 2.349 | ＜0.001 | ＜0.001 |
| NRAS | 1.679 | 1.265 | 2.227 | ＜0.001 | 0.004 |
| GART | 2.074 | 1.390 | 3.094 | ＜0.001 | ＜0.001 |
| LRRC59 | 1.974 | 1.356 | 2.874 | ＜0.001 | ＜0.001 |
| YWHAQ | 2.002 | 1.363 | 2.940 | ＜0.001 | ＜0.001 |
| MAD2L1 | 1.689 | 1.261 | 2.261 | ＜0.001 | ＜0.001 |
| SLC29A4 | 1.382 | 1.153 | 1.657 | ＜0.001 | ＜0.001 |
| MVD | 1.386 | 1.154 | 1.665 | ＜0.001 | ＜0.001 |
| HYOU1 | 1.739 | 1.273 | 2.376 | 0.001 | ＜0.001 |
| JOSD1 | 1.649 | 1.244 | 2.187 | 0.001 | ＜0.001 |
| ELOVL3 | 1.343 | 1.134 | 1.589 | 0.001 | 0.001 |
| TMEM237 | 1.757 | 1.271 | 2.428 | 0.001 | ＜0.001 |
| ARHGDIA | 2.081 | 1.363 | 3.177 | 0.001 | ＜0.001 |
| GMNN | 1.669 | 1.241 | 2.245 | 0.001 | ＜0.001 |
| FBN2 | 1.341 | 1.132 | 1.589 | 0.001 | 0.001 |
| TIMM17A | 1.769 | 1.270 | 2.463 | 0.001 | ＜0.001 |
| FDPS | 1.317 | 1.122 | 1.547 | 0.001 | ＜0.001 |
| MSX1 | 1.459 | 1.170 | 1.820 | 0.001 | ＜0.001 |
| TTLL12 | 1.619 | 1.217 | 2.155 | 0.001 | ＜0.001 |
| NAGS | 1.337 | 1.125 | 1.588 | 0.001 | ＜0.001 |
| SNX6 | 1.872 | 1.289 | 2.719 | 0.001 | 0.001 |
| SUPT16H | 1.865 | 1.287 | 2.704 | 0.001 | 0.003 |
| SH3BP5L | 1.969 | 1.315 | 2.948 | 0.001 | ＜0.001 |
| WEE1 | 1.712 | 1.242 | 2.359 | 0.001 | ＜0.001 |
| YWHAH | 1.661 | 1.219 | 2.263 | 0.001 | ＜0.001 |
| CA2 | 1.406 | 1.140 | 1.734 | 0.001 | ＜0.001 |
| C1orf43 | 1.683 | 1.221 | 2.319 | 0.001 | ＜0.001 |
| ATP10D | 1.549 | 1.183 | 2.030 | 0.001 | 0.001 |
| CDKN2A | 1.383 | 1.130 | 1.693 | 0.002 | ＜0.001 |
| FAT1 | 1.350 | 1.120 | 1.629 | 0.002 | ＜0.001 |
| EXTL2 | 1.463 | 1.152 | 1.858 | 0.002 | 0.001 |
| MCM2 | 1.515 | 1.167 | 1.967 | 0.002 | ＜0.001 |
| STK19 | 1.735 | 1.226 | 2.455 | 0.002 | 0.001 |
| AGFG1 | 1.605 | 1.187 | 2.170 | 0.002 | 0.001 |
| SFXN3 | 1.780 | 1.232 | 2.570 | 0.002 | ＜0.001 |
| ACKR3 | 1.521 | 1.163 | 1.988 | 0.002 | ＜0.001 |
| CTPS1 | 1.327 | 1.107 | 1.590 | 0.002 | ＜0.001 |
| LDHA | 1.531 | 1.165 | 2.011 | 0.002 | 0.001 |
| LIPA | 1.565 | 1.173 | 2.088 | 0.002 | ＜0.001 |
| PRMT5 | 1.501 | 1.155 | 1.950 | 0.002 | ＜0.001 |
| PFKP | 1.670 | 1.199 | 2.325 | 0.002 | ＜0.001 |
| SMC4 | 1.317 | 1.100 | 1.578 | 0.003 | 0.001 |
| PCK2 | 1.460 | 1.134 | 1.879 | 0.003 | 0.002 |
| GALNT18 | 1.308 | 1.091 | 1.568 | 0.004 | ＜0.001 |
| MSH2 | 1.435 | 1.124 | 1.832 | 0.004 | ＜0.001 |
| P4HB | 1.743 | 1.196 | 2.539 | 0.004 | ＜0.001 |
| CYP26B1 | 1.488 | 1.136 | 1.949 | 0.004 | 0.002 |
| POLE4 | 1.289 | 1.084 | 1.533 | 0.004 | 0.002 |
| MB21D2 | 1.552 | 1.148 | 2.098 | 0.004 | 0.001 |
| TGIF2 | 1.502 | 1.135 | 1.986 | 0.004 | ＜0.001 |
| RTN4R | 1.502 | 1.134 | 1.989 | 0.005 | 0.005 |
| STXBP1 | 1.224 | 1.064 | 1.407 | 0.005 | ＜0.001 |
| SLC39A10 | 1.609 | 1.156 | 2.240 | 0.005 | ＜0.001 |
| HTATIP2 | 1.618 | 1.154 | 2.269 | 0.005 | ＜0.001 |
| PLEK2 | 1.427 | 1.111 | 1.834 | 0.005 | ＜0.001 |
| SLC1A4 | 1.208 | 1.057 | 1.382 | 0.006 | ＜0.001 |
| LRRC42 | 1.344 | 1.090 | 1.657 | 0.006 | ＜0.001 |
| ACAT2 | 1.612 | 1.147 | 2.265 | 0.006 | 0.002 |
| RPS12 | 1.243 | 1.063 | 1.453 | 0.006 | 0.003 |
| TRIB3 | 1.552 | 1.131 | 2.130 | 0.006 | 0.001 |
| DAD1 | 1.250 | 1.065 | 1.468 | 0.006 | ＜0.001 |
| RUVBL1 | 1.628 | 1.143 | 2.317 | 0.007 | 0.004 |
| PRIM1 | 1.651 | 1.146 | 2.379 | 0.007 | ＜0.001 |
| PGAM1 | 1.625 | 1.137 | 2.320 | 0.008 | ＜0.001 |
| ACTR3 | 1.559 | 1.110 | 2.189 | 0.010 | ＜0.001 |
| NRIP3 | 1.587 | 1.104 | 2.281 | 0.013 | 0.006 |
| PDIA6 | 1.333 | 1.056 | 1.683 | 0.016 | ＜0.001 |
| FTSJ3 | 1.351 | 1.056 | 1.729 | 0.017 | ＜0.001 |
| CTHRC1 | 1.471 | 1.070 | 2.023 | 0.018 | 0.001 |
| SAE1 | 1.164 | 1.018 | 1.330 | 0.026 | 0.003 |
| CCT2 | 1.455 | 1.034 | 2.047 | 0.031 | ＜0.001 |
| PNP | 1.390 | 1.028 | 1.878 | 0.032 | 0.001 |
| MCC | 1.338 | 1.014 | 1.765 | 0.039 | 0.003 |

**Supplementary Table 5:** Gene cluster result.

| ID | Cluster | ID | Cluster | ID | Cluster |
| --- | --- | --- | --- | --- | --- |
| TCGA_TCGA-OR-A5KZ | A | TCGA_TCGA-OR-A5L4 | B | TCGA_TCGA-OR-A5JX | C |
| TCGA_TCGA-OR-A5JA | A | TCGA_TCGA-OR-A5LJ | B | TCGA_TCGA-OR-A5J6 | C |
| TCGA_TCGA-OR-A5K0 | A | TCGA_TCGA-OR-A5JG | B | TCGA_TCGA-OR-A5KU | C |
| TCGA_TCGA-OR-A5JE | A | TCGA_TCGA-OR-A5J3 | B | TCGA_TCGA-PK-A5HA | C |
| TCGA_TCGA-OR-A5LC | A | TCGA_TCGA-P6-A5OF | B | TCGA_TCGA-OR-A5L6 | C |
| TCGA_TCGA-OR-A5LE | A | TCGA_TCGA-OR-A5KT | B | TCGA_TCGA-OR-A5LA | C |
| TCGA_TCGA-OR-A5K9 | A | TCGA_TCGA-OU-A5PI | B | TCGA_TCGA-PA-A5YG | C |
| TCGA_TCGA-P6-A5OG | A | TCGA_TCGA-OR-A5KV | B | TCGA_TCGA-OR-A5K1 | C |
| TCGA_TCGA-OR-A5JJ | A | TCGA_TCGA-OR-A5KX | B | TCGA_TCGA-OR-A5JI | C |
| TCGA_TCGA-OR-A5JB | A | TCGA_TCGA-OR-A5K2 | B | TCGA_TCGA-OR-A5L3 | C |
| TCGA_TCGA-OR-A5JP | A | TCGA_TCGA-OR-A5JL | B | TCGA_TCGA-OR-A5K8 | C |
| TCGA_TCGA-OR-A5KO | A | TCGA_TCGA-PK-A5H8 | B | TCGA_TCGA-OR-A5LN | C |
| TCGA_TCGA-OR-A5JS | A | TCGA_TCGA-OR-A5J9 | B | TCGA_TCGA-OR-A5JF | C |
| TCGA_TCGA-OR-A5JM | A | TCGA_TCGA-OR-A5JQ | B | TCGA_TCGA-OR-A5LG | C |
| TCGA_TCGA-OR-A5J8 | A | TCGA_TCGA-OR-A5L8 | B | TCGA_TCGA-OR-A5LT | C |
| TCGA_TCGA-OR-A5JY | A | TCGA_TCGA-OR-A5JZ | B | TCGA_TCGA-OR-A5LM | C |
| TCGA_TCGA-PK-A5HB | A | TCGA_TCGA-OR-A5JO | B | TCGA_TCGA-OR-A5LK | C |
| TCGA_TCGA-OR-A5J7 | A | TCGA_TCGA-OR-A5K6 | B | TCGA_TCGA-OR-A5L5 | C |
| TCGA_TCGA-OR-A5KY | A | TCGA_TCGA-OR-A5LB | B | TCGA_TCGA-OR-A5LH | C |
| TCGA_TCGA-OR-A5K5 | A | TCGA_TCGA-OR-A5JW | B | TCGA_TCGA-OR-A5JT | C |
| GSE19776_GSM493255 | A | TCGA_TCGA-OR-A5LO | B | TCGA_TCGA-OR-A5LR | C |
| GSE19776_GSM493256 | A | TCGA_TCGA-OR-A5KW | B | TCGA_TCGA-OR-A5JC | C |
| GSE19776_GSM493257 | A | TCGA_TCGA-OR-A5K4 | B | TCGA_TCGA-OR-A5J5 | C |
| GSE19776_GSM1094057 | A | TCGA_TCGA-PK-A5H9 | B | TCGA_TCGA-OR-A5K3 | C |
| GSE19776_GSM1094058 | A | TCGA_TCGA-OR-A5J2 | B | TCGA_TCGA-OR-A5LP | C |
| GSE19776_GSM1094062 | A | TCGA_TCGA-OR-A5LS | B | TCGA_TCGA-OR-A5L9 | C |
| GSE19776_GSM1094065 | A | GSE19776_GSM493258 | B | TCGA_TCGA-OR-A5JD | C |
| GSE19776_GSM1094069 | A | GSE19776_GSM493259 | B | TCGA_TCGA-OR-A5JV | C |
| GSE19776_GSM1094077 | A | GSE19776_GSM493261 | B | TCGA_TCGA-OR-A5LD | C |
| GSE19776_GSM1094078 | A | GSE19776_GSM493262 | B | TCGA_TCGA-OR-A5JK | C |
| GSE19776_GSM1094080 | A | GSE19776_GSM493263 | B | TCGA_TCGA-OR-A5JR | C |
|  |  | GSE19776_GSM493270 | B | TCGA_TCGA-OR-A5LL | C |
|  |  | GSE19776_GSM493271 | B | TCGA_TCGA-OR-A5J1 | C |
|  |  | GSE19776_GSM1094056 | B | GSE19776_GSM493260 | C |
|  |  | GSE19776_GSM1094070 | B | GSE19776_GSM493264 | C |
|  |  | GSE19776_GSM1094071 | B | GSE19776_GSM493265 | C |
|  |  | GSE19776_GSM1094074 | B | GSE19776_GSM493266 | C |
|  |  | GSE19776_GSM1094076 | B | GSE19776_GSM493267 | C |
|  |  | GSE19776_GSM1094079 | B | GSE19776_GSM493268 | C |
|  |  |  |  | GSE19776_GSM493269 | C |
|  |  |  |  | GSE19776_GSM493272 | C |
|  |  |  |  | GSE19776_GSM493273 | C |
|  |  |  |  | GSE19776_GSM1094059 | C |
|  |  |  |  | GSE19776_GSM1094060 | C |
|  |  |  |  | GSE19776_GSM1094061 | C |
|  |  |  |  | GSE19776_GSM1094063 | C |
|  |  |  |  | GSE19776_GSM1094064 | C |
|  |  |  |  | GSE19776_GSM1094066 | C |
|  |  |  |  | GSE19776_GSM1094067 | C |
|  |  |  |  | GSE19776_GSM1094068 | C |
|  |  |  |  | GSE19776_GSM1094072 | C |
|  |  |  |  | GSE19776_GSM1094073 | C |
|  |  |  |  | GSE19776_GSM1094075 | C |

**Supplementary Table 6:**: Immune score and stromal score in ACC samples by ESTIMATE algorithm

| ID | StromalScore | Immune  Score | ESTIMATE  Score | Tumor  Purity |
| --- | --- | --- | --- | --- |
| TCGA_TCGA-OR-A5KZ | -191.186 | -3.381 | -194.567 | 0.838 |
| TCGA_TCGA-OR-A5JA | -973.601 | -62.257 | -1035.859 | 0.899 |
| TCGA_TCGA-OR-A5K0 | -1174.155 | -369.054 | -1543.209 | 0.929 |
| TCGA_TCGA-OR-A5L4 | -149.580 | 81.779 | -67.801 | 0.828 |
| TCGA_TCGA-OR-A5JX | -500.808 | -2.935 | -503.743 | 0.862 |
| TCGA_TCGA-OR-A5J6 | -301.784 | 738.032 | 436.247 | 0.784 |
| TCGA_TCGA-OR-A5LJ | -965.400 | -49.306 | -1014.706 | 0.898 |
| TCGA_TCGA-OR-A5KU | -657.962 | -648.492 | -1306.454 | 0.916 |
| TCGA_TCGA-OR-A5JG | -449.434 | -40.246 | -489.680 | 0.861 |
| TCGA_TCGA-OR-A5JE | -383.319 | 259.442 | -123.878 | 0.833 |
| TCGA_TCGA-OR-A5LC | -238.632 | -242.677 | -481.310 | 0.861 |
| TCGA_TCGA-OR-A5LE | -1348.575 | -975.324 | -2323.899 | 0.965 |
| TCGA_TCGA-OR-A5J3 | -889.371 | -485.562 | -1374.933 | 0.920 |
| TCGA_TCGA-PK-A5HA | 413.602 | 1102.207 | 1515.809 | 0.677 |
| TCGA_TCGA-OR-A5K9 | -660.255 | -557.461 | -1217.716 | 0.911 |
| TCGA_TCGA-P6-A5OG | 1277.505 | 2067.601 | 3345.106 | 0.457 |
| TCGA_TCGA-P6-A5OF | -317.168 | -158.243 | -475.411 | 0.860 |
| TCGA_TCGA-OR-A5KT | 705.525 | 1317.899 | 2023.424 | 0.620 |
| TCGA_TCGA-OU-A5PI | -207.445 | -518.891 | -726.335 | 0.878 |
| TCGA_TCGA-OR-A5JJ | -783.843 | -406.613 | -1190.455 | 0.909 |
| TCGA_TCGA-OR-A5L6 | -446.645 | 430.963 | -15.682 | 0.824 |
| TCGA_TCGA-OR-A5LA | 297.081 | 1195.123 | 1492.204 | 0.679 |
| TCGA_TCGA-PA-A5YG | 427.143 | 1227.078 | 1654.221 | 0.662 |
| TCGA_TCGA-OR-A5K1 | -289.133 | 312.092 | 22.959 | 0.821 |
| TCGA_TCGA-OR-A5JB | -150.146 | 1962.681 | 1812.535 | 0.644 |
| TCGA_TCGA-OR-A5KV | -1106.857 | -940.997 | -2047.854 | 0.954 |
| TCGA_TCGA-OR-A5JP | -393.393 | -540.433 | -933.827 | 0.893 |
| TCGA_TCGA-OR-A5JI | 391.264 | 658.030 | 1049.294 | 0.726 |
| TCGA_TCGA-OR-A5KX | -975.544 | -234.046 | -1209.590 | 0.910 |
| TCGA_TCGA-OR-A5K2 | -477.202 | 68.477 | -408.725 | 0.855 |
| TCGA_TCGA-OR-A5L3 | -723.479 | -62.565 | -786.044 | 0.883 |
| TCGA_TCGA-OR-A5JL | -742.733 | 131.252 | -611.482 | 0.870 |
| TCGA_TCGA-OR-A5K8 | -737.155 | -167.715 | -904.870 | 0.891 |
| TCGA_TCGA-OR-A5KO | -1155.265 | -852.923 | -2008.188 | 0.952 |
| TCGA_TCGA-OR-A5LN | -131.150 | 1280.446 | 1149.296 | 0.715 |
| TCGA_TCGA-OR-A5JF | -574.923 | -500.595 | -1075.518 | 0.902 |
| TCGA_TCGA-OR-A5JS | -1062.782 | -522.672 | -1585.454 | 0.932 |
| TCGA_TCGA-OR-A5LG | -203.171 | 471.064 | 267.894 | 0.800 |
| TCGA_TCGA-OR-A5LT | -866.940 | -467.303 | -1334.243 | 0.917 |
| TCGA_TCGA-OR-A5LM | -739.622 | -117.952 | -857.574 | 0.887 |
| TCGA_TCGA-OR-A5LK | 189.158 | 1776.029 | 1965.188 | 0.627 |
| TCGA_TCGA-OR-A5L5 | 504.655 | 872.272 | 1376.926 | 0.692 |
| TCGA_TCGA-OR-A5JM | -1083.972 | -974.709 | -2058.681 | 0.955 |
| TCGA_TCGA-PK-A5H8 | -519.375 | 149.636 | -369.739 | 0.852 |
| TCGA_TCGA-OR-A5J9 | -681.102 | -427.691 | -1108.794 | 0.904 |
| TCGA_TCGA-OR-A5JQ | 345.558 | 870.011 | 1215.568 | 0.709 |
| TCGA_TCGA-OR-A5LH | -711.754 | 300.197 | -411.556 | 0.855 |
| TCGA_TCGA-OR-A5JT | -712.863 | -142.317 | -855.180 | 0.887 |
| TCGA_TCGA-OR-A5L8 | -564.953 | -872.736 | -1437.689 | 0.923 |
| TCGA_TCGA-OR-A5LR | -214.490 | 150.442 | -64.049 | 0.828 |
| TCGA_TCGA-OR-A5JC | -396.505 | 97.399 | -299.106 | 0.847 |
| TCGA_TCGA-OR-A5JZ | -486.181 | 271.934 | -214.247 | 0.840 |
| TCGA_TCGA-OR-A5J8 | 1853.076 | 2132.859 | 3985.935 | 0.372 |
| TCGA_TCGA-OR-A5JY | -595.778 | 275.346 | -320.432 | 0.848 |
| TCGA_TCGA-OR-A5J5 | -1203.126 | -366.110 | -1569.236 | 0.931 |
| TCGA_TCGA-OR-A5K3 | -571.654 | 436.499 | -135.155 | 0.834 |
| TCGA_TCGA-OR-A5JO | 972.298 | 2172.557 | 3144.856 | 0.483 |
| TCGA_TCGA-OR-A5K6 | -484.203 | 145.688 | -338.514 | 0.850 |
| TCGA_TCGA-OR-A5LB | -923.773 | -788.379 | -1712.152 | 0.938 |
| TCGA_TCGA-OR-A5LP | 553.534 | 680.981 | 1234.515 | 0.707 |
| TCGA_TCGA-OR-A5JW | -622.318 | -117.183 | -739.501 | 0.879 |
| TCGA_TCGA-OR-A5LO | -1100.283 | -1041.939 | -2142.222 | 0.958 |
| TCGA_TCGA-OR-A5KW | -640.512 | -596.933 | -1237.444 | 0.912 |
| TCGA_TCGA-OR-A5K4 | -1387.363 | -689.636 | -2076.999 | 0.955 |
| TCGA_TCGA-PK-A5H9 | 40.488 | 383.282 | 423.770 | 0.786 |
| TCGA_TCGA-OR-A5L9 | 224.870 | 1201.408 | 1426.277 | 0.686 |
| TCGA_TCGA-OR-A5JD | -204.880 | 792.896 | 588.016 | 0.770 |
| TCGA_TCGA-OR-A5JV | 279.810 | 1613.186 | 1892.996 | 0.635 |
| TCGA_TCGA-PK-A5HB | -589.223 | -224.462 | -813.685 | 0.884 |
| TCGA_TCGA-OR-A5J7 | -803.949 | -447.424 | -1251.372 | 0.913 |
| TCGA_TCGA-OR-A5KY | -66.010 | 44.793 | -21.217 | 0.824 |
| TCGA_TCGA-OR-A5K5 | -911.550 | -327.100 | -1238.650 | 0.912 |
| TCGA_TCGA-OR-A5J2 | -127.381 | -179.183 | -306.564 | 0.847 |
| TCGA_TCGA-OR-A5LD | -834.259 | -731.241 | -1565.501 | 0.930 |
| TCGA_TCGA-OR-A5JK | 154.265 | 1559.157 | 1713.422 | 0.655 |
| TCGA_TCGA-OR-A5LS | -1019.808 | -661.595 | -1681.403 | 0.937 |
| TCGA_TCGA-OR-A5JR | -494.535 | 377.620 | -116.915 | 0.832 |
| TCGA_TCGA-OR-A5LL | -680.426 | -274.336 | -954.763 | 0.894 |
| TCGA_TCGA-OR-A5J1 | -686.175 | 24.515 | -661.660 | 0.874 |
| GSE19776_GSM493255 | -834.538 | -374.000 | -1208.538 | 0.910 |
| GSE19776_GSM493256 | -612.834 | 1753.337 | 1140.503 | 0.716 |
| GSE19776_GSM493257 | -1486.629 | 1164.351 | -322.279 | 0.848 |
| GSE19776_GSM493258 | -929.285 | -96.565 | -1025.851 | 0.899 |
| GSE19776_GSM493259 | -1680.865 | -764.335 | -2445.200 | 0.970 |
| GSE19776_GSM493260 | -1392.276 | -712.179 | -2104.455 | 0.956 |
| GSE19776_GSM493261 | -466.453 | -72.438 | -538.892 | 0.865 |
| GSE19776_GSM493262 | -574.122 | -155.082 | -729.203 | 0.879 |
| GSE19776_GSM493263 | -1074.471 | -133.279 | -1207.749 | 0.910 |
| GSE19776_GSM493264 | -95.317 | 814.468 | 719.151 | 0.758 |
| GSE19776_GSM493265 | -1200.133 | -83.585 | -1283.718 | 0.914 |
| GSE19776_GSM493266 | -561.738 | 552.016 | -9.722 | 0.823 |
| GSE19776_GSM493267 | -495.264 | 359.494 | -135.769 | 0.834 |
| GSE19776_GSM493268 | -371.524 | 1459.708 | 1088.184 | 0.722 |
| GSE19776_GSM493269 | 1219.846 | 1990.510 | 3210.357 | 0.475 |
| GSE19776_GSM493270 | 70.685 | 548.169 | 618.854 | 0.768 |
| GSE19776_GSM493271 | -710.139 | -16.067 | -726.206 | 0.878 |
| GSE19776_GSM493272 | 1050.857 | 1159.990 | 2210.848 | 0.598 |
| GSE19776_GSM493273 | 1382.242 | 1680.893 | 3063.135 | 0.494 |
| GSE19776_GSM1094056 | -888.858 | -731.372 | -1620.230 | 0.933 |
| GSE19776_GSM1094057 | -256.458 | -258.160 | -514.618 | 0.863 |
| GSE19776_GSM1094058 | -783.091 | -992.783 | -1775.874 | 0.941 |
| GSE19776_GSM1094059 | -337.625 | 346.125 | 8.501 | 0.822 |
| GSE19776_GSM1094060 | 242.694 | -401.213 | -158.519 | 0.836 |
| GSE19776_GSM1094061 | -88.699 | 883.470 | 794.770 | 0.751 |
| GSE19776_GSM1094062 | -341.459 | -347.819 | -689.279 | 0.876 |
| GSE19776_GSM1094063 | -726.845 | 22.206 | -704.638 | 0.877 |
| GSE19776_GSM1094064 | -202.157 | 403.948 | 201.791 | 0.805 |
| GSE19776_GSM1094065 | -941.413 | -860.423 | -1801.836 | 0.943 |
| GSE19776_GSM1094066 | -1377.562 | -583.102 | -1960.664 | 0.950 |
| GSE19776_GSM1094067 | 212.305 | 558.903 | 771.208 | 0.753 |
| GSE19776_GSM1094068 | 163.108 | 78.060 | 241.168 | 0.802 |
| GSE19776_GSM1094069 | -1281.021 | -796.660 | -2077.682 | 0.955 |
| GSE19776_GSM1094070 | 81.331 | 151.945 | 233.276 | 0.803 |
| GSE19776_GSM1094071 | -610.449 | -446.972 | -1057.421 | 0.901 |
| GSE19776_GSM1094072 | 137.333 | 321.367 | 458.700 | 0.782 |
| GSE19776_GSM1094073 | 716.165 | 258.399 | 974.563 | 0.733 |
| GSE19776_GSM1094074 | -284.057 | -431.518 | -715.575 | 0.878 |
| GSE19776_GSM1094075 | -362.973 | -470.349 | -833.322 | 0.886 |
| GSE19776_GSM1094076 | -214.684 | 124.528 | -90.156 | 0.830 |
| GSE19776_GSM1094077 | -63.390 | 52.362 | -11.028 | 0.823 |
| GSE19776_GSM1094078 | -641.443 | -245.698 | -887.141 | 0.889 |
| GSE19776_GSM1094079 | -407.788 | 160.265 | -247.523 | 0.843 |
| GSE19776_GSM1094080 | -608.669 | -440.611 | -1049.281 | 0.900 |
